# Supplementary material for: Expanding Predictive Capacities in Toxicology: Insights from Hackathon-Enhanced Data and Model Aggregation
Source: MDPI journal article supplement (doi:10.3390/molecules29081826), 2024-04-17
Supplement: s1 [file s1]

## Supporting Information

# Expanding Predictive Capacities in Toxicology: Insights from Hackathon-Enhanced Data and Model Aggregation

Dmitrii O. Shkil <sup>1,2,\*</sup>, Alina A. Muhamedzhanova <sup>1</sup>, Philipp I. Petrov <sup>3</sup>, Ekaterina V. Skorb <sup>4</sup>, Timur A. Aliev <sup>4</sup>,

Ilya S. Steshin <sup>1</sup>, Alexander V. Tumanov <sup>1</sup>, Alexander S. Kislinskiy <sup>1</sup> and Maxim V. Fedorov <sup>5,\*</sup>

<sup>1</sup> Syntelly LLC, Moscow 121205, Russia; muhamedzhanova@syntelly.com (A.A.M.); steshin@syntelly.com (I.S.S.); tumanov@syntelly.com (A.V.T.); kislinskiy@syntelly.com (A.S.K.)

<sup>2</sup> Moscow Institute of Physics and Technology, Moscow 141700, Russia

<sup>3</sup> Medtech.Moscow, Moscow 119571, Russia; philip.i.petrov@gmail.com

<sup>4</sup> Infochemistry Scientific Center, ITMO University, Saint-Petersburg 191002, Russia; skorb@itmo.ru (E.V.S.); aliev@infochemistry.ru (T.A.A.)

<sup>5</sup> Kharkevich Institute for Information Transmission Problems of Russian Academy of Sciences, Moscow 127994, Russia

\* Correspondence: shkil@syntelly.com ([D.O.S.](mailto:shkil@syntelly.com)); fedorov@iitp.ru (M.V.F.)

## S1. Hyperparameter optimization.

For CatBoost, Optuna hyperparameter search was used for each of the hackathon datasets:

1. learning\_rate: range( $10^{-5}$ , 1, log=True);
2. iterations: range(100, 1000);
3. colsample\_bylevel: range(0.01, 0.1);
4. l2\_leaf\_reg: range( $10^{-8}$ , 100, log=True);
5. depth: range(3, 11);
6. random\_strength: range( $10^{-7}$ , 20.0, log=True);
7. boosting\_type: [Ordered, Plain];
8. bootstrap\_type: [Bayesian, Bernoulli, MVS];
9. bagging\_temperature: range(0, 10);
10. subsample: range(0.1, 1).

For XGBoost, a grid search was carried out for regression problems (Mouse Intraperitoneal LD<sub>50</sub>, Mouse Intravenous LD<sub>50</sub>, Mouse Oral LD<sub>50</sub>) and classification (BBB Penetration). Among the gridsearch parameters we used:

1. max\_depth: range(1, 14, 1);
2. learning\_rate: [0.1, 0.01, 0.001];
3. subsample: [1, 0.75, 0.5, 0.3];
4. n\_estimators: [1500, 2000, 2500, 3000];
5. reg\_lambda: [1, 2, 4];
6. reg\_alpha: [0, 10, 40];
7. colsample\_bytree: [1, 0.75, 0.5, 0.3];
8. min\_child\_weight: [1, 5, 10].

The best parameters from gridsearch were selected: learning\_rate=0.01, n\_estimators=2000, max\_depth=12. Tree construction method: approximate greedy algorithm optimized for histogram (hist). For the remaining datasets, a reduced gridsearch subsample was used: [1, 0.75, 0.5, 0.3]. Reduced gridsearch was used to save hyperparameter selection time. Another reason that there was no actual difference between selected hyperparameters and founded parameters for particular toxicity case, except subsample value.

### Descriptors

**Table S1.** Divided into groups features that were used by participants during the hackathon.

| Descriptors     | Fingerprints  | Graph Featurizers | Text Embeddings |
|-----------------|---------------|-------------------|-----------------|
| CATS            | Avalon        | DeepChem          | ChemBERT        |
| Mordred         | Ghose Crippen | PyTorch Geometric | PyTorch         |
| Murcko Scaffold | MACCS         | graph2vec         | RoBERTa         |
| PaDELPy         | Morgan        | node2vec          | Sklearn TF-IDF  |
| PyBioMed        | PaDELPy       |                   | mol2vec         |
| RDKit           |               |                   |                 |

**Table S2.** Used abbreviations for molecular descriptors

| Descriptor | Decipherment                                                                              | Link |
|------------|-------------------------------------------------------------------------------------------|------|
| TPSA       | Topological polar surface area based on fragments                                         | [1]  |
| LabuteASA  | Labute's Approximate Surface Area                                                         | [2]  |
| Kappa 1-3  | A differential molecular connectivity index                                               | [3]  |
| SlogPVSA   | MOE-type descriptor using SLogP contributions and surface area contributions              | [4]  |
| SMRVSA     | MOE-type descriptor using molar refractivity contributions and surface area contributions | [4]  |
| EStateVSA  | Electron State Van der Waals Surface Area Descriptor                                      | [2]  |

### References

1. Prasanna, S.; Doerksen, R.-J. Topological polar surface area: a useful descriptor in 2D-QSAR. *Curr. Med. Chem.* **2009**, *16*, 21–41.
2. Labute, P. A widely applicable set of descriptors. *J. Mol. Graph. Model* **2000**, *18*, 464–477.
3. Kier, L.; Hall, L. A Differential Molecular Connectivity Index. *Quant. Struct. Act. Relatsh.* **1991**, *10*, 134–140.
4. Menchinskaya, E.; Chingizova, E.; Pisyagin, E.; Likhatskaya, G.; Sabutski, Y.; Pelageev, D.; Plolonik, S.; Aminin, D. Neuroprotective Effect of 1,4-Naphthoquinones in an In Vitro Model of Paraquat and 6-OHDA-Induced Neurotoxicity. *Int. J. Mol. Sci.* **2021**, *22*, 9933.
